# Supplementary material for: Monitoring of Chemical and Fermentative Characteristics during Different Treatments of Grape Pomace Silage
Source: MDPI journal article supplement (doi:10.3390/agriculture13122264), 2023-12-12
Supplement: s1 [file s1]

**Table S1.** P-values of two-way ANOVA of chemical composition of the fresh and the ensiled grape pomace.

| Variable                       | Day of ensiling | Control       | Grape pomace + lactic acid bacteria | Grape pomace + zeolite |
|--------------------------------|-----------------|---------------|-------------------------------------|------------------------|
| DM<br>(g kg <sup>-1</sup> )    | 0               | 1.000 (1.000) | 1.000 (1.000)                       | 1.000 (1.000)          |
|                                | 30              | 1.000 (0.968) | 0.061 (0.445)                       | 0.801 (0.135)          |
|                                | 60              | 1.000 (1.000) | 0.542 (0.047)                       | 0.656 (0.752)          |
|                                | 90              | 1.000 (0.306) | 0.997 (1.000)                       | 0.003 (0.604)          |
| WSC<br>(g kg <sup>-1</sup> DM) | 0               | 1.000 (1.000) | 1.000 (1.000)                       | 1.000 (1.000)          |
|                                | 30              | 1.000 (0.001) | 0.001 (0.001)                       | 0.001 (0.001)          |
|                                | 60              | 1.000 (0.001) | 0.001 (0.001)                       | 0.001 (0.001)          |
|                                | 90              | 1.000 (0.001) | 0.001 (0.001)                       | 0.001 (0.001)          |
| CP<br>(g kg <sup>-1</sup> DM)  | 0               | 1.000 (1.000) | 1.000 (1.000)                       | 1.000 (1.000)          |
|                                | 30              | 1.000 (0.001) | 0.001 (0.001)                       | 0.001 (0.001)          |
|                                | 60              | 1.000 (0.001) | 0.001 (0.001)                       | 0.001 (0.001)          |
|                                | 90              | 1.000 (0.001) | 0.001 (0.001)                       | 0.001 (0.001)          |
| NDF<br>(g kg <sup>-1</sup> DM) | 0               | 1.000 (1.000) | 1.000 (1.000)                       | 1.000 (1.000)          |
|                                | 30              | 1.000 (0.001) | 0.001 (0.001)                       | 0.001 (0.001)          |
|                                | 60              | 1.000 (0.001) | 0.001 (0.001)                       | 0.001 (0.001)          |
|                                | 90              | 1.000 (0.001) | 0.001 (0.001)                       | 0.001 (0.001)          |
| ADF<br>(g kg <sup>-1</sup> DM) | 0               | 1.000 (1.000) | 1.000 (1.000)                       | 1.000 (1.000)          |
|                                | 30              | 1.000 (0.063) | 0.001 (0.001)                       | 0.001 (0.001)          |
|                                | 60              | 1.000 (0.001) | 0.001 (0.001)                       | 0.001 (0.001)          |
|                                | 90              | 1.000 (0.001) | 0.001 (0.001)                       | 0.001 (0.001)          |

**Table S2.** P-values of two-way ANOVA of fermentative characteristics of the grape pomace silage.

| Variable                                   | Day of ensiling | Control       | Grape pomace + lactic acid bacteria | Grape pomace + zeolite |
|--------------------------------------------|-----------------|---------------|-------------------------------------|------------------------|
| pH                                         | 0               | 1.000 (1.000) | 1.000 (1.000)                       | 1.000 (1.000)          |
|                                            | 30              | 1.000 (0.001) | 0.997 (0.001)                       | 0.976 (0.001)          |
|                                            | 60              | 1.000 (0.001) | 1.000 (0.001)                       | 0.976 (0.001)          |
|                                            | 90              | 1.000 (0.001) | 1.000 (0.001)                       | 0.091 (0.001)          |
| Lactic acid (g kg <sup>-1</sup> DM)        | 0               | 1.000 (1.000) | 1.000 (1.000)                       | 1.000 (1.000)          |
|                                            | 30              | 1.000 (0.001) | 0.001 (0.664)                       | 0.001 (0.578)          |
|                                            | 60              | 1.000 (0.001) | 0.001 (0.999)                       | 0.001 (0.001)          |
|                                            | 90              | 1.000 (0.001) | 0.001 (0.001)                       | 0.001 (0.001)          |
| Acetic acid (g kg <sup>-1</sup> DM)        | 0               | 1.000 (1.000) | 1.000 (1.000)                       | 1.000 (1.000)          |
|                                            | 30              | 1.000 (0.001) | 0.001 (0.664)                       | 0.001 (0.578)          |
|                                            | 60              | 1.000 (0.001) | 0.001 (0.999)                       | 0.001 (0.001)          |
|                                            | 90              | 1.000 (0.001) | 0.001 (0.001)                       | 0.001 (0.001)          |
| NH <sub>3</sub> -N (g kg <sup>-1</sup> DM) | 0               | 1.000 (1.000) | 1.000 (1.000)                       | 1.000 (1.000)          |
|                                            | 30              | 1.000 (0.001) | 0.001 (0.001)                       | 0.001 (0.001)          |
|                                            | 60              | 1.000 (0.001) | 0.001 (0.001)                       | 0.001 (0.001)          |
|                                            | 90              | 1.000 (0.001) | 0.999 (0.001)                       | 0.998 (0.001)          |
